# Supplementary material
Source: MDPI journal article supplement (https://www.mdpi.com/2227-7390/12/2/347)
Supplement: s1 [file s1]

## Supplementary Material

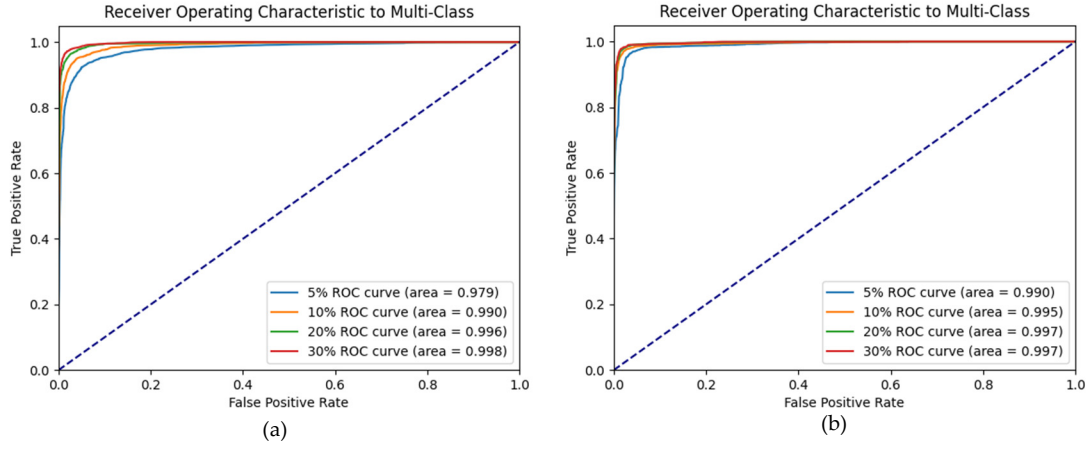

**Figure S1.** ROC curves for TLSDA using different labeled training sample ratios (5%, 10%, 20% and 30%) for tests in (a) Dataset B and (b) Dataset C.

**Table S1.** Evaluation results of TLSDA with different training sample ratios

| Dataset | Ratios | ACC (%)      | Precision (%) | Recall (%)   | Specificity (%) | AUC          | MCC          |
|---------|--------|--------------|---------------|--------------|-----------------|--------------|--------------|
| B       | 5%     | 91.11        | 92.02         | 91.09        | 95.37           | 0.979        | 0.867        |
|         | 10%    | 93.63        | 93.73         | 93.74        | 96.74           | 0.990        | 0.903        |
|         | 20%    | 95.47        | 95.62         | 95.26        | 97.67           | 0.996        | 0.931        |
|         | 30%    | <b>96.51</b> | <b>96.52</b>  | <b>96.40</b> | <b>98.22</b>    | <b>0.998</b> | <b>0.947</b> |
| C       | 5%     | 95.79        | 95.88         | 95.79        | 97.89           | 0.990        | 0.937        |
|         | 10%    | 96.59        | 96.61         | 96.59        | 98.30           | 0.995        | 0.949        |
|         | 20%    | 97.17        | 97.18         | 97.17        | 98.58           | 0.997        | 0.958        |
|         | 30%    | <b>97.38</b> | <b>97.39</b>  | <b>97.38</b> | <b>98.69</b>    | <b>0.997</b> | <b>0.961</b> |

Bold indicate best results among the comparison ratios.
